# Supplementary material for: One-pot synthesis of luminol–gallium nanoassemblies and their peroxidase-mimetic activity for colorimetric detection of pyrophosphate
Source: Royal Society of Chemistry journal article supplement (doi:10.1039/d0nj02628j), 2020-01-01
Supplement: d0nj02628j1.pdf [file d0nj02628j1.pdf]

Electronic Supporting Information (ESI):

## One-pot synthesis of luminol-gallium nanoassemblies and their peroxidase-mimetic activity for colorimetric detection of pyrophosphate

Xue Tian,<sup>a</sup> Wenjing Qi,<sup>\*a</sup> Maoyu Zhao,<sup>a</sup> Jianping Lai,<sup>b</sup> Di Wu,<sup>a</sup> Lianzhe Hu,<sup>a</sup> Yan Zhang<sup>a</sup>

<sup>a</sup> Chongqing Key Laboratory of Green Synthesis and Applications, College of Chemistry,

Chongqing Normal University, Chongqing 401331, P. R. China.

<sup>b</sup> Key Laboratory of Eco-Chemical Engineering, Taishan Scholar Advantage and Characteristic Discipline Team of Eco-Chemical Process and Technology, College of Chemistry and Molecular Engineering, Qingdao University of Science and Technology, Qingdao 266042, P. R. China

\*Corresponding author. E-mail: wenjingqi616@cqnu.edu.cn (W. Qi); Tel:+86-23-65362777.

### Optimization of Method.

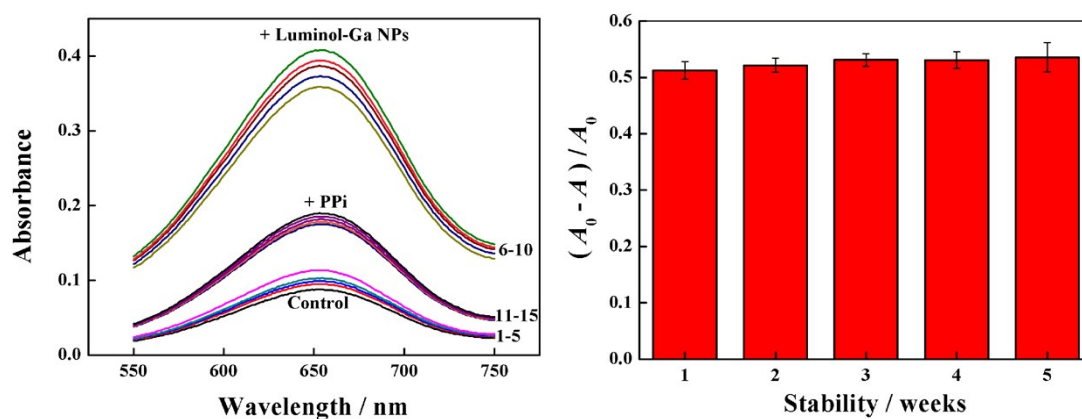

**Fig. S1** The stability for catalyst activity of luminol-Ga nanoassemblies and its application in PPI detection.  $c(\text{PPI}, \mu\text{M})$ : 10.  $c(\text{luminol}, \text{mM})$ : 0.8;  $c(\text{Ga}^{3+})$ : 0.1 mM;  $c(\text{H}_2\text{O}_2, \text{M})$ : 0.2;  $c(\text{TMB}, \text{mM})$ : 1; 0.04 M acetate buffer solution: pH 4.0.  $A_0$  represents the absorbance of luminol-Ga nanoassemblies-TMB- $\text{H}_2\text{O}_2$  system (control);  $A$  represents the absorbance of luminol-Ga nanoassemblies-TMB- $\text{H}_2\text{O}_2$  system in the presence of PPI;  $(A_0 - A)/A_0$  represents the absorbance decreased effect after the addition of PPI to luminol-Ga nanoassemblies-TMB- $\text{H}_2\text{O}_2$  system. All the error bars represent the standard deviation of three measurements.

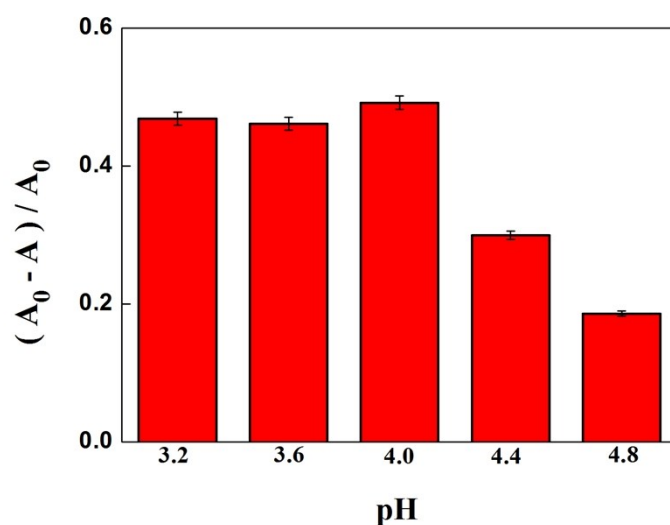

**Fig. S2** The effect of pH on the PPI detection. 0.04 M acetate buffer solution pH: 3.2, 3.6, 4.0, 4.4 and 4.8.  $c(\text{PPI}, \mu\text{M})$ : 15;  $c(\text{luminol}, \text{mM})$ : 0.8;  $c(\text{Ga}^{3+})$ : 0.1 mM;  $c(\text{H}_2\text{O}_2, \text{M})$ : 0.2;  $c(\text{TMB}, \text{mM})$ : 1; 0.04 M acetate buffer solution: pH 4.0.  $A_0$  represents the absorbance of luminol-Ga nanoassemblies-TMB- $\text{H}_2\text{O}_2$  system (control);  $A$  represents the absorbance of luminol-Ga nanoassemblies-TMB- $\text{H}_2\text{O}_2$  system in the presence of PPI;  $(A_0 - A) / A_0$  represents the absorbance decreased effect after the addition of PPI to luminol-Ga nanoassemblies-TMB- $\text{H}_2\text{O}_2$  system. All the error bars represent the standard deviation of three measurements.

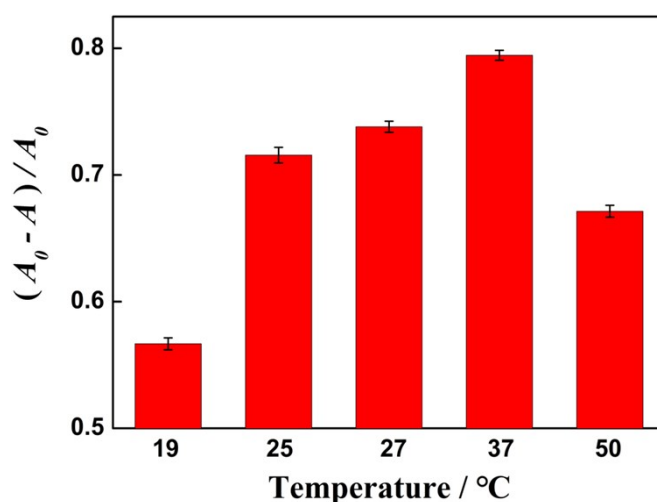

**Fig. S3** The effect of oxidation reaction temperature on PPI detection using luminol- $\text{Ga}^{3+}$  nanoassemblies. Temperature ( $^{\circ}\text{C}$ ): 19, 25, 27, 37 and 50.  $c(\text{PPI}, \mu\text{M})$ : 15;

$c(\text{luminol, mM})$ : 0.8;  $c(\text{Ga}^{3+})$ : 0.1 mM;  $c(\text{H}_2\text{O}_2, \text{M})$ : 0.2;  $c(\text{TMB, mM})$ : 1; 0.04 M acetate buffer solution: pH 4.0.  $A_0$  represents the absorbance of luminol-Ga nanoassemblies-TMB- $\text{H}_2\text{O}_2$  system (control);  $A$  represents the absorbance of luminol-Ga nanoassemblies-TMB- $\text{H}_2\text{O}_2$  system in the presence of PPI;  $(A_0-A)/A_0$  represents the absorbance decreased effect after the addition of PPI to luminol-Ga nanoassemblies-TMB- $\text{H}_2\text{O}_2$  system. All the error bars represent the standard deviation of three measurements.

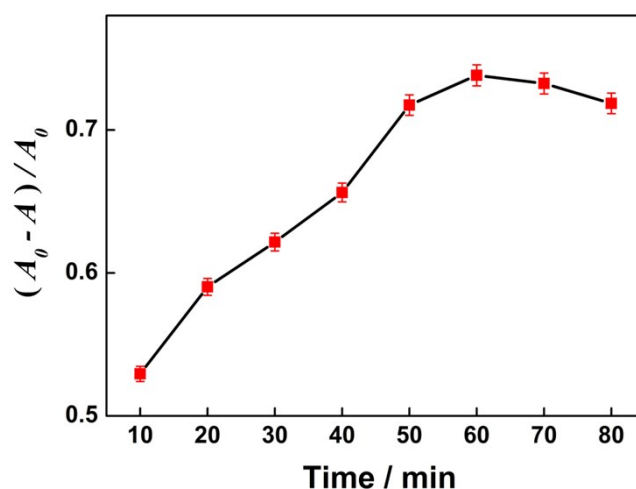

**Fig. S4** The effect of oxidation reaction time on PPI detection using luminol- $\text{Ga}^{3+}$  nanoassemblies. Reaction time (min): 10, 20, 30, 40, 50, 60, 70 and 80.  $c(\text{PPI, } \mu\text{M})$ : 15;  $c(\text{luminol, mM})$ : 0.8;  $c(\text{Ga}^{3+})$ : 0.1 mM;  $c(\text{H}_2\text{O}_2, \text{M})$ : 0.2;  $c(\text{TMB, mM})$ : 1; 0.04 M acetate buffer solution: pH 4.0. All the error bars represent the standard deviation of three measurements.  $A_0$  represents the absorbance of luminol-Ga nanoassemblies-TMB- $\text{H}_2\text{O}_2$  system (control);  $A$  represents the absorbance of luminol-Ga nanoassemblies-TMB- $\text{H}_2\text{O}_2$  system in the presence of PPI;  $(A_0-A)/A_0$  represents the absorbance decreased effect after the addition of PPI to luminol-Ga nanoassemblies-TMB- $\text{H}_2\text{O}_2$  system. All the error bars represent the standard deviation of three measurements.

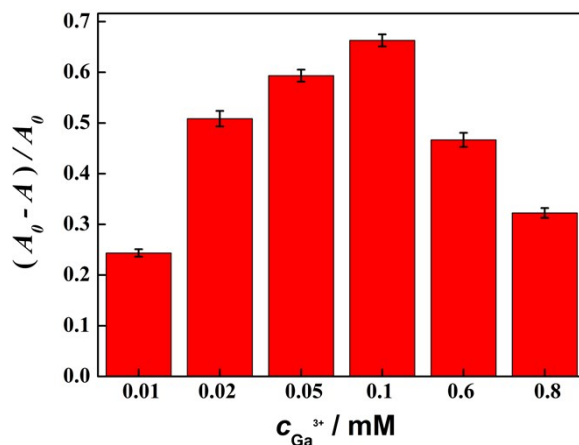

**Fig. S5** The effect of  $\text{Ga}^{3+}$  on PPI detection using luminol- $\text{Ga}^{3+}$  nanoassemblies.  $c(\text{Ga}^{3+}, \text{mM})$ : 0.01, 0.02, 0.05, 0.1, 0.6 and 0.8;  $c(\text{luminol}, \text{mM})$ : 0.8;  $c(\text{PPI}, \mu\text{M})$ : 15;  $c(\text{H}_2\text{O}_2, \text{M})$ : 0.2;  $c(\text{TMB}, \text{mM})$ : 1; 0.04 M acetate buffer solution: pH 4.0. All the error bars represent the standard deviation of three measurements.

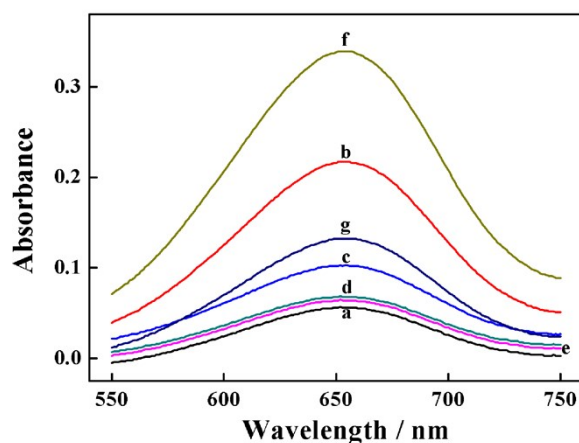

**Fig. S6** Comparison of PPI detection and mechanism investigation. TMB- $\text{H}_2\text{O}_2$  system (curve a); luminol-TMB- $\text{H}_2\text{O}_2$  system (curve b); PPI-luminol-TMB- $\text{H}_2\text{O}_2$  system (curve c);  $\text{Ga}^{3+}$ -TMB- $\text{H}_2\text{O}_2$  system (curve d); PPI- $\text{Ga}^{3+}$ -TMB- $\text{H}_2\text{O}_2$  system (curve e); luminol-Ga nanoassemblies-TMB- $\text{H}_2\text{O}_2$  system (curve f); PPI-luminol-Ga nanoassemblies-TMB- $\text{H}_2\text{O}_2$  system (curve g).  $c(\text{PPI}, \mu\text{M})$ : 10;  $c(\text{luminol}, \text{mM})$ : 0.8;  $c(\text{Ga}^{3+})$ : 0.1 mM;  $c(\text{H}_2\text{O}_2, \text{M})$ : 0.2;  $c(\text{TMB}, \text{mM})$ : 1; 0.04 M acetate buffer solution: pH 4.0.

**Table S1** The anti-interference ability.

| <b>Coexisting substances</b>       | <b>Coexisting concentration<br/>(<math>\mu\text{M}</math>)</b> | <b>Changes of absorbance<br/>(%)</b> |
|------------------------------------|----------------------------------------------------------------|--------------------------------------|
| Na(I), $\text{Cl}^-$               | 750                                                            | + 2.8                                |
| K(I), $\text{Cl}^-$                | 750                                                            | - 3.4                                |
| Mg(II), $\text{Cl}^-$              | 750                                                            | + 3.8                                |
| Ca(II), $\text{Cl}^-$              | 750                                                            | - 4.2                                |
| Zn(II), $\text{SO}_4^{2-}$         | 750                                                            | - 3.7                                |
| Fe(III), $\text{Cl}^-$             | 750                                                            | - 2.8                                |
| K(I), $\text{NO}_3^-$              | 750                                                            | + 2.5                                |
| Na(III), $\text{PO}_4^{3-}$        | 300                                                            | + 4.4                                |
| Na(III), $\text{HPO}_4^{2-}$       | 300                                                            | + 2.8                                |
| Na(III), $\text{H}_2\text{PO}_4^-$ | 300                                                            | + 3.2                                |
| K(I), $\text{I}^-$                 | 750                                                            | - 2.6                                |
| K(I), $\text{Br}^-$                | 750                                                            | - 2.9                                |

The concentration of PPI is 15  $\mu\text{M}$ . Other conditions are kept the same with the procedures of PPI detection mentioned above.

**Table S2** Recovery tests of PPI in lake water and tap water samples

| <b>Samples</b> | <b>Added PPI<br/>(<math>\mu\text{M}</math>)</b> | <b>Found PPI<br/>(<math>\mu\text{M}</math>, n=3)</b> | <b>Mean recovery<br/>(%, n=3)</b> |
|----------------|-------------------------------------------------|------------------------------------------------------|-----------------------------------|
| 1 <sup>a</sup> | 2                                               | 1.97, 1.94, 2.03                                     | 98.7 $\pm$ 2.5                    |
| 2 <sup>a</sup> | 6                                               | 5.86, 5.92, 5.90                                     | 98.2 $\pm$ 0.5                    |
| 3 <sup>a</sup> | 10                                              | 10.35, 10.28, 10.16                                  | 102.6 $\pm$ 0.9                   |
| 4 <sup>b</sup> | 2                                               | 1.91, 1.95, 1.98                                     | 97.3 $\pm$ 1.8                    |
| 5 <sup>b</sup> | 6                                               | 5.88, 6.21, 6.14                                     | 101.3 $\pm$ 2.9                   |
| 6 <sup>b</sup> | 10                                              | 9.85, 10.22, 10.10                                   | 100.6 $\pm$ 0.2                   |

<sup>a</sup> lake water samples <sup>b</sup> tap water samples
